# Supplementary material for: Circadian sleep/wake-associated cells show dipeptide repeat protein aggregates in C9orf72-related ALS and FTLD cases
Source: PubMed Central journal article supplement (PMC6889626; doi:10.1186/s40478-019-0845-9), 2019-12-02
Supplement: 40478_2019_845_MOESM2_ESM.pdf [file 40478_2019_845_MOESM2_ESM.pdf]

Additional File 2

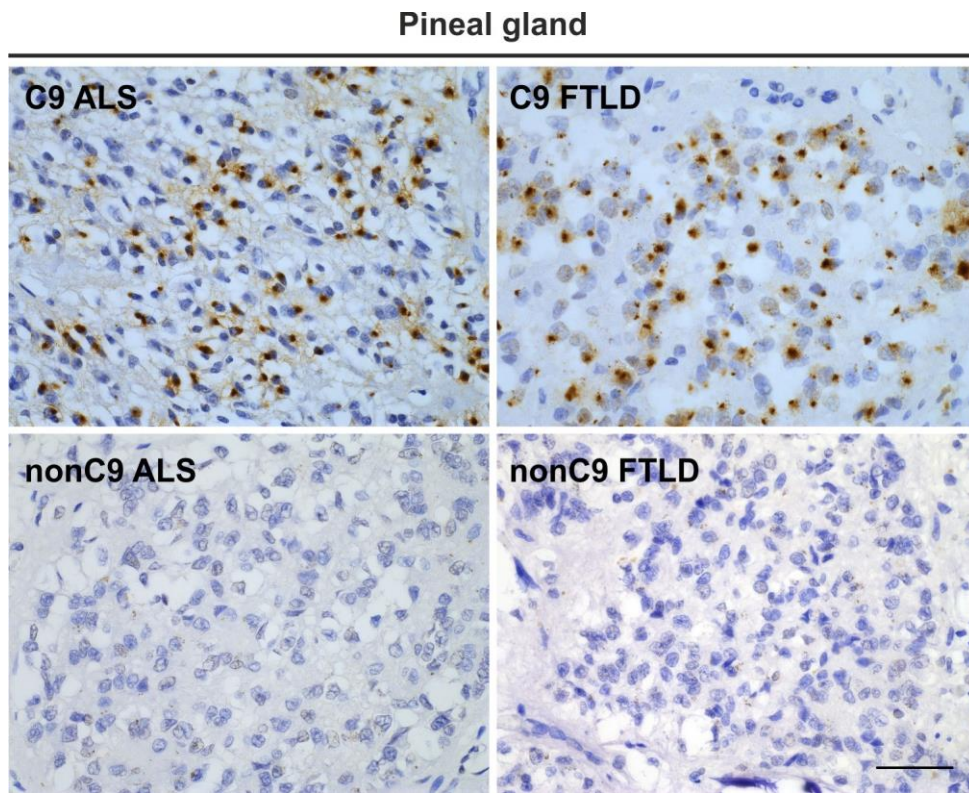

**Figure S1: Poly(GA) pathology in the pineal gland of *C9orf72* and non*C9orf72* ALS and FTLD cases.** Numerous poly(GA) inclusions were observed in the pineal gland of *C9orf72* cases with ALS or FTLD in a similar manner (case C9-2 and C9-7), but not in the pineal gland tissue of non*C9orf72* cases (case nonC9-11 and nonC9-1). Scale bar represents 50  $\mu$ m.

### SCN-related neurons

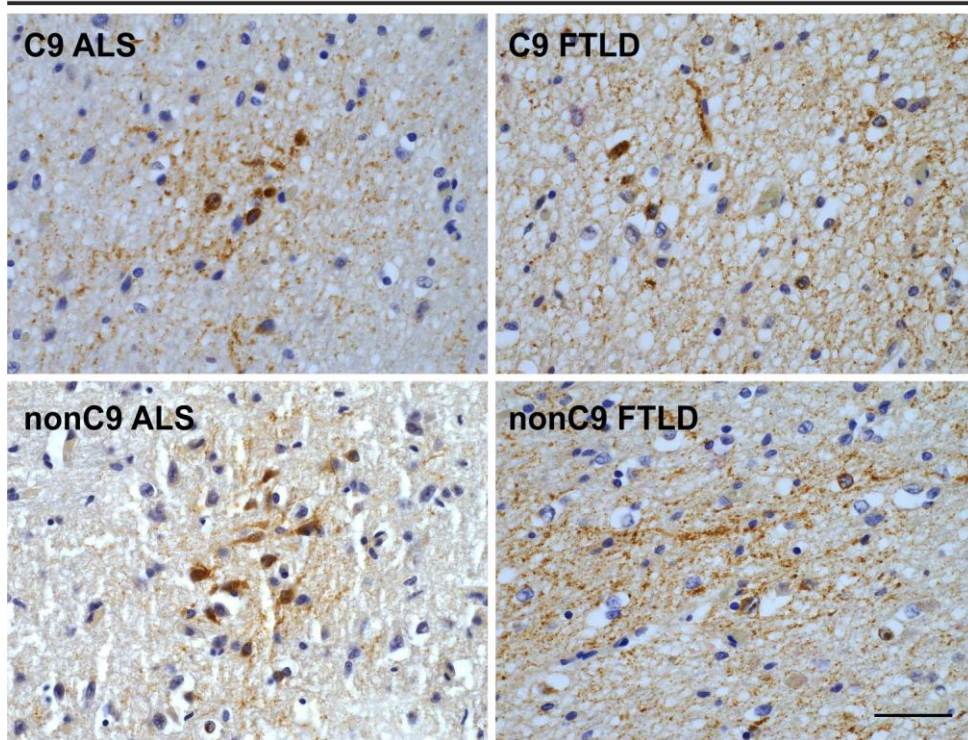

**Figure S2: VIP-immunostaining of the SCN-related neurons in *C9orf72* and non*C9orf72* ALS and FTLD cases.** VIP-positive neurons are observed in ALS or FTLD-TDP cases with and without the *C9orf72* repeat expansion (case C9-3, C9-7, nonC9-17, nonC9-1). Due to mild-moderate variations in the cutting levels of the hypothalamus sections, it is not possible to draw conclusions about differences in the pattern of the SCN-related neurons. Scale bar represents 50  $\mu$ m. VIP stands for vasoactive intestinal peptide; SCN, suprachiasmatic nucleus
